# Supplementary material for: Using Peer Discussion Facilitated by Clicker Questions in an Informal Education Setting: Enhancing Farmer Learning of Science
Source: PLOS journal article supplement (doi:10.1371/journal.pone.0047564), 2012-10-15
Supplement: S2 (10.1371/journal.pone.0047564.s002) [file journal.pone.0047564.s002]

# What is your sex and age?

- A. female, younger than 40
- B. female, 40 or older
- C. male, younger than 40
- D. male, 40 or older

# What is the level of YOUR education?

- A. middle school
- B. high school
- C. some college, no degree
- D. college degree (university or community)
- E. graduate courses or degree (MS or PhD)

# Which best describes you?

- A. I am a grower on land I own
- B. I am a manager on other people's land
- C. I am a grower on land I own AND a manager on other people's land
- D. I am a landowner BUT NOT a grower or manager
- E. Other

How long have you worked with  
blueberries?

- A. Less than 2 years
- B. 2-5 years
- C. 6-10 years
- D. 11-30 years
- E. More than 31 years

How much of my or our (if family)  
income is derived from blueberries?

- A. greater than 90% of income
- B. about 75% of income
- C. about 50% of income
- D. about 25% of income
- E. less than 25% of income
