# Supplementary material for: Using Peer Discussion Facilitated by Clicker Questions in an Informal Education Setting: Enhancing Farmer Learning of Science
Source: PLOS journal article supplement (doi:10.1371/journal.pone.0047564), 2012-10-15

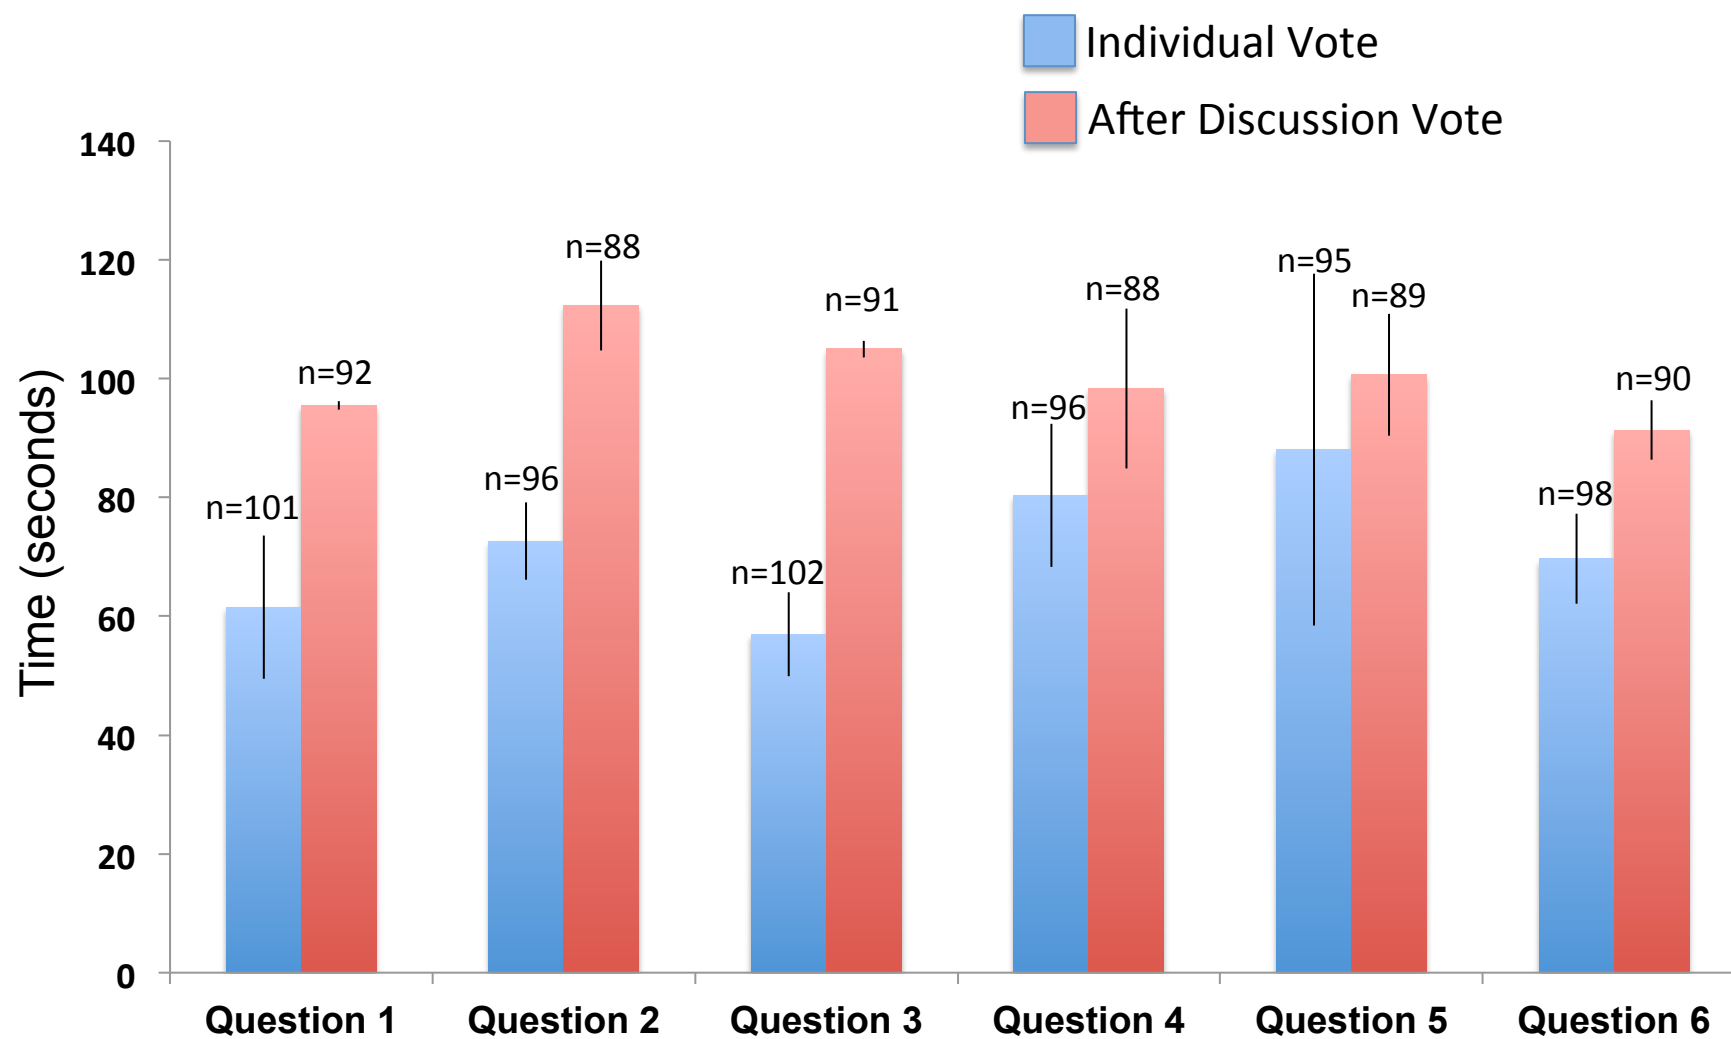

Supplement: S3 (10.1371/journal.pone.0047564.s003) [file journal.pone.0047564.s003]
